# Supplementary material for: Usual alcohol consumption and suicide mortality among the Korean elderly in rural communities: Kangwha Cohort Study
Source: PubMed Central journal article supplement — J Epidemiol Community Health. 2016 Feb 17;70(8):778–83. doi: 10.1136/jech-2015-206849 (PMC4975804; doi:10.1136/jech-2015-206849), 2016-02-17
Supplement: jech-2015-206849-s1.pdf [file jech-2015-206849-s1.pdf]

## ONLINE SUPPLEMENT

### Usual alcohol consumption and suicide mortality among Korean elderly in rural communities: Kangwha Cohort Study

**Sang-Wook Yi**, Department of Preventive Medicine and Public Health, Catholic Kwandong University College of Medicine; **Myoungjee Jung**, Department of Public Health, Yonsei University Graduate School; **Heejin Kimm**, Department of Epidemiology and Health Promotion, Graduate School of Public Health, Yonsei University; **Jae-Woong Sull**, Department of Biomedical Laboratory Science, Eulji University College of Health Science; **Eunsook Lee**, Department of Nursing, Sangmyung University; **Kwang Ok Lee**, Department of Nursing, Sangmyung University; **Heechoul Ohrr**, Department of Preventive Medicine, Yonsei University College of Medicine.

Correspondence: Prof. Sang-Wook Yi, MD, PhD, Department of Preventive Medicine and Public Health, Catholic Kwandong University College of Medicine, Bumil-ro 579, Gangneung, Gangwon-do, 25601, Republic of Korea. Tel: +82-33-649-7468; Fax +82-33-641-1074; E-mail: flyhigh@cku.ac.kr

Table S1. Crude death rates and hazard ratios of suicide death by other risk factors in Korean elderly.

| Variables                          | Classification           | Person-years | No. suicide | Crude suicide rate <sup>a</sup><br>(95% CI) | Unadjusted |                  | Multivariable-adjusted |                          |
|------------------------------------|--------------------------|--------------|-------------|---------------------------------------------|------------|------------------|------------------------|--------------------------|
|                                    |                          |              |             |                                             | p-value    | HR (95% CI)      | p-value                | HR <sup>b</sup> (95% CI) |
| Age at enrollment                  | One-year increase        | 88,376       | 61          | 69 (54-89)                                  | 0.916      | 1.00 (0.96-1.05) | 0.598                  | 1.01 (0.97-1.06)         |
| Gender                             | Women                    | 55,396       | 24          | 43 (29-64)                                  |            | 1.00 (Reference) |                        | 1.00 (Reference)         |
|                                    | Men                      | 32,980       | 37          | 112 (81-155)                                | <0.001     | 3.01 (1.8-5.05)  | 0.322                  | 1.49 (0.68-3.25)         |
| Smoking                            | Current smoker           | 34,358       | 37          | 108 (78-148)                                | <0.001     | 3.25 (1.88-5.61) | 0.037                  | 2.09 (1.05-4.18)         |
|                                    | Past smoker              | 3,458        | 4           | 116 (45-297)                                | 0.028      | 3.32 (1.13-9.73) | 0.201                  | 2.13 (0.67-6.82)         |
|                                    | Never smoker             | 50,559       | 20          | 40 (26-61)                                  |            | 1.00 (Reference) |                        | 1.00 (Reference)         |
| Body mass index, kg/m <sup>2</sup> | <18.5                    | 5,910        | 2           | 34 (9-123)                                  | 0.374      | 0.53 (0.13-2.17) | 0.292                  | 0.46 (0.11-1.93)         |
|                                    | 18.5-24.9                | 65,645       | 49          | 75 (56-99)                                  |            | 1.00 (Reference) |                        | 1.00 (Reference)         |
|                                    | ≥25.0                    | 16,821       | 10          | 59 (32-109)                                 | 0.417      | 0.75 (0.38-1.49) | 0.707                  | 1.14 (0.57-2.31)         |
| Hypertension                       | No                       | 40,080       | 33          | 82 (59-116)                                 |            | 1.00 (Reference) |                        | 1.00 (Reference)         |
|                                    | Yes                      | 48,296       | 28          | 58 (40-84)                                  | 0.358      | 0.79 (0.48-1.31) | 0.215                  | 0.72 (0.43-1.21)         |
| Self-rated health                  | Good or fair             | 69,256       | 42          | 61 (45-82)                                  |            | 1.00 (Reference) |                        | 1.00 (Reference)         |
|                                    | Poor                     | 19,120       | 19          | 99 (64-155)                                 | 0.057      | 1.69 (0.98-2.91) | 0.024                  | 1.88 (1.09-3.26)         |
| Marital status                     | Living with a spouse     | 60,492       | 52          | 86 (66-113)                                 |            | 1.00 (Reference) |                        | 1.00 (Reference)         |
|                                    | Not living with a spouse | 27,884       | 9           | 32 (17-61)                                  | 0.013      | 0.41 (0.2-0.83)  | 0.203                  | 0.60 (0.27-1.32)         |
| Education                          | Ever                     | 33,967       | 26          | 77 (52-112)                                 |            | 1.00 (Reference) |                        | 1.00 (Reference)         |
|                                    | Never                    | 54,409       | 35          | 64 (46-89)                                  | 0.606      | 0.87 (0.53-1.45) | 0.235                  | 1.42 (0.8-2.52)          |
| Occupation                         | Non-agriculture          | 15,670       | 6           | 38 (18-84)                                  |            | 1.00 (Reference) |                        | 1.00 (Reference)         |
|                                    | Agriculture              | 72,706       | 55          | 76 (58-98)                                  | 0.110      | 1.99 (0.86-4.62) | 0.172                  | 1.81 (0.77-4.24)         |

CI, confidence interval; HR, hazard ratio

<sup>a</sup> Death rate per 100,000 person-years

<sup>b</sup> Variables included in the Cox model were all variables in the table and alcohol intake status (current drinker, non-drinker).

Table S2. Adjusted hazard ratios of suicide death by alcohol intake-related variables according to different models in Korean elderly during 1985-2008 (Sensitivity analysis).

| Variables                                                                       | Classification                           | Model1 <sup>a</sup> |                  | Model2 <sup>b</sup> |                  | Model3 <sup>c</sup> |                  |
|---------------------------------------------------------------------------------|------------------------------------------|---------------------|------------------|---------------------|------------------|---------------------|------------------|
|                                                                                 |                                          | p-value             | HR (95% CI)      | p-value             | HR (95% CI)      | p-value             | HR (95% CI)      |
| Alcohol intake status                                                           | Non-drinker                              |                     | 1.00 (Reference) |                     | 1.00 (Reference) |                     | 1.00 (Reference) |
|                                                                                 | Current drinker                          | 0.107               | 1.68 (0.9-3.14)  | 0.112               | 1.66 (0.89-3.11) | 0.108               | 1.67 (0.89-3.13) |
| Alcohol intake frequency                                                        | Non-drinker                              |                     | 1.00 (Reference) |                     | 1.00 (Reference) |                     | 1.00 (Reference) |
|                                                                                 | 4 or less days a month                   | 0.792               | 1.13 (0.45-2.84) | 0.778               | 1.14 (0.46-2.85) | 0.760               | 1.15 (0.46-2.89) |
|                                                                                 | 2-6 days a week                          | 0.257               | 1.58 (0.72-3.49) | 0.277               | 1.55 (0.7-3.41)  | 0.271               | 1.56 (0.71-3.43) |
|                                                                                 | Daily                                    | 0.003               | 3.65 (1.57-8.47) | 0.003               | 3.54 (1.53-8.18) | 0.003               | 3.50 (1.51-8.09) |
| Alcohol intake frequency                                                        | One drinking day increase per week       | 0.006               | 1.17 (1.05-1.31) | 0.007               | 1.17 (1.04-1.31) | 0.008               | 1.17 (1.04-1.31) |
| Alcohol intake amount, g alcohol/drinking day (drink/drinking day) <sup>d</sup> | Non-drinker                              |                     | 1.00 (Reference) |                     | 1.00 (Reference) |                     | 1.00 (Reference) |
|                                                                                 | Below 70 g (<5 drinks)                   | 0.882               | 1.06 (0.47-2.42) | 0.894               | 1.06 (0.47-2.4)  | 0.898               | 1.05 (0.46-2.39) |
|                                                                                 | 70-139 g (5-9 drinks)                    | 0.027               | 2.42 (1.1-5.31)  | 0.028               | 2.42 (1.1-5.3)   | 0.025               | 2.46 (1.12-5.41) |
|                                                                                 | 140 g or over (≥10 drinks)               | 0.029               | 2.81 (1.11-7.11) | 0.030               | 2.79 (1.1-7.07)  | 0.030               | 2.79 (1.1-7.06)  |
| Alcohol intake amount                                                           | 5 drink (70 g) increase per drinking day | 0.002               | 1.38 (1.12-1.69) | 0.002               | 1.38 (1.12-1.69) | 0.002               | 1.38 (1.12-1.69) |
| Alcohol intake amount, g alcohol/week (drink/week) <sup>d</sup>                 | Non-drinker                              |                     | 1.00 (Reference) |                     | 1.00 (Reference) |                     | 1.00 (Reference) |
|                                                                                 | Below 70 g (<5 drinks)                   | 0.952               | 0.97 (0.38-2.46) | 0.953               | 0.97 (0.39-2.45) | 0.956               | 0.97 (0.39-2.46) |
|                                                                                 | 70-209 g (5-14 drinks)                   | 0.559               | 1.38 (0.47-4.04) | 0.574               | 1.36 (0.47-3.98) | 0.554               | 1.38 (0.47-4.05) |
|                                                                                 | 210-419 g (15-29 drinks)                 | 0.028               | 2.85 (1.12-7.26) | 0.028               | 2.84 (1.12-7.19) | 0.030               | 2.80 (1.11-7.11) |
| Alcohol intake amount                                                           | 420 g or over (≥30 drinks)               | 0.011               | 2.96 (1.28-6.83) | 0.013               | 2.89 (1.25-6.67) | 0.012               | 2.91 (1.26-6.72) |
|                                                                                 | 140 g (10-drink) increase per week       | <0.001              | 1.12 (1.06-1.19) | <0.001              | 1.12 (1.06-1.19) | <0.001              | 1.12 (1.06-1.19) |

CI, confidence interval; HR, hazard ratio

a In order to reduce overfitting, risk factors with the model p value < 0.2 for the Wald test in the univariate Cox analysis were included in the multivariable Cox model; those factors were sex, smoking status, self-rated health compared to the same age group, marital status, and occupation.

b Due to a potential violation of the proportional assumption from hypertension, marital status, and a dummy variable of BMI (≥ 25 kg/m<sup>2</sup>), these three variables were excluded, and age at enrollment, sex, smoking status, self-rated health compared to the same age group, education, and occupation were adjusted for.

- c Due to a potential violation of the proportional assumption from hypertension, marital status, and a dummy variable of BMI ( $\geq 25 \text{ kg/m}^2$ ), a Cox model stratified by marital status was applied after adjustment for age at enrollment, sex, smoking status, self-rated health compared to the same age group, education, and occupation (since marital status [p=0.013] was associated with suicide death in univariate Cox analysis, while BMI [p=0.51] and hypertension [p=0.36] were not).
- d 1 standard drink was considered to be approximately 14 g according to the National Institute on Alcohol Abuse and Alcoholism of the US.

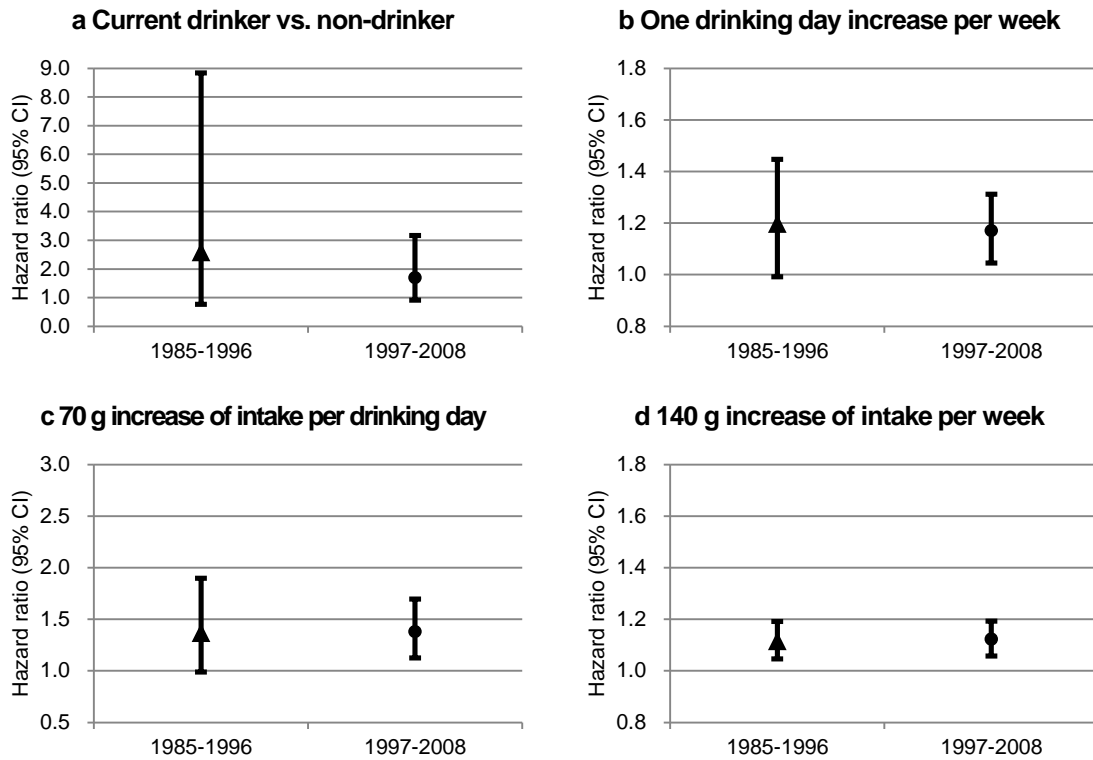

Figure S1. Hazard ratios of suicide death by alcohol consumption-related variables according to follow-up period (1985-1996, 1997-2008). Co-variables included in the Cox model were age at enrollment (continuous variable), sex (men, women), smoking status (current smoker, past smoker, never smoker), body mass index ( $\text{kg}/\text{m}^2$ ;  $<18.5$ ,  $18.5-24.9$ ,  $\geq 25$ ), hypertension (measured blood pressure  $\geq 140/90$  mmHg or on regular medication; yes, no), self-rated health compared to the same age group (good or fair, poor), marital status (living with a spouse, not living with a spouse), education (ever, never), and occupation (non-agriculture, agriculture).
